# Supplementary material for: A pyridine based Schiff base as a selective and sensitive fluorescent probe for cadmium ions with “turn-on” fluorescence responses
Source: Royal Society of Chemistry journal article supplement (doi:10.1039/d1nj05919j), 2022-01-01
Supplement: d1nj05919j1.pdf [file d1nj05919j1.pdf]

## Electronic Supplementary Information

### A pyridine based Schiff base as a selective and sensitive fluorescent probe for cadmium ions with “turn-on” fluorescence responses

Jialin Ma,<sup>a</sup> Yuwei Dong,<sup>\*a</sup> Zhou Yu,<sup>a</sup> Yan Wu,<sup>b</sup> and Zhen Zhao,<sup>\*a,c</sup>

<sup>a</sup> Institute of Catalysis for Energy and Environment, College of Chemistry & Chemical Engineering, Shenyang Normal University, Shenyang, Liaoning 110034, P. R. China

<sup>b</sup> Qiqihar Medical University, Qiqihar, Heilongjiang 161006, P. R. China

<sup>c</sup> State Key Laboratory of Heavy Oil Processing, College of Science, China University of Petroleum, Beijing 102249, P. R. China

E-mail: ywdong@syneu.edu.cn and zhenzhao@cup.edu.cn

### Index

|            | Content                                                                                                                                                                 | Page No. |
|------------|-------------------------------------------------------------------------------------------------------------------------------------------------------------------------|----------|
| Figure S1  | <sup>1</sup> H NMR spectrum of probe <b>PMPA</b> in CDCl <sub>3</sub> .                                                                                                 | 2        |
| Figure S2  | <sup>13</sup> C NMR spectrum of probe <b>PMPA</b> in CDCl <sub>3</sub> .                                                                                                | 2        |
| Figure S3  | FT-IR spectra of (a) probe <b>PMPA</b> and (b) complex <b>PMPA-CdCl<sub>2</sub></b> .                                                                                   | 3        |
| Figure S4  | ESI-MS spectrum of probe <b>PMPA</b> .                                                                                                                                  | 3        |
| Figure S5  | Absorption spectra (black line) and fluorescence emission spectra (blue line) of probe <b>PMPA</b> in acetonitrile solution. The concentration was maintained at 10 μM. | 4        |
| Figure S6  | Fluorescence decay profile for probe <b>PMPA</b> in acetonitrile solution (λ <sub>ex</sub> = 380 nm, λ <sub>em</sub> = 468 nm).                                         | 4        |
| Figure S7  | The fluorescence intensity of <b>PMPA</b> and <b>PMPA-Cd<sup>2+</sup></b> at different pH (1–12).                                                                       | 5        |
| Figure S8  | The effect of response time on the fluorescence intensity of <b>PMPA</b> over the addition of Cd <sup>2+</sup> (at 506 nm).                                             | 5        |
| Figure S9  | The excitation spectrum of probe <b>PMPA</b> upon addition of Cd <sup>2+</sup> .                                                                                        | 6        |
| Figure S10 | ESI-MS spectrum of the complex <b>PMPA-CdCl<sub>2</sub></b> .                                                                                                           | 6        |
| Figure S11 | Coordination geometry of cadmium(II) ions in the complex <b>PMPA-CdCl<sub>2</sub></b> .                                                                                 | 7        |
| Figure S12 | The binuclear unit of the complex <b>PMPA-CdCl<sub>2</sub></b> .                                                                                                        | 7        |
| Figure S13 | Depiction of the dihedral angle between the pyridine ring and the phenyl ring in the complex <b>PMPA-CdCl<sub>2</sub></b> .                                             | 8        |
| Figure S14 | <sup>1</sup> H NMR spectrum of the complex <b>PMPA-CdCl<sub>2</sub></b> in CDCl <sub>3</sub> .                                                                          | 8        |
| Figure S15 | <sup>13</sup> C NMR spectrum of the complex <b>PMPA-CdCl<sub>2</sub></b> in CDCl <sub>3</sub> .                                                                         | 9        |
| Table S1   | Standard deviation calculation.                                                                                                                                         | 9        |
| Table S2   | Crystallographic and structural determination data for the complex <b>PMPA-CdCl<sub>2</sub></b> .                                                                       | 10       |
| Table S3   | Selected bond distances (Å) and angles (°) for the complex <b>PMPA-CdCl<sub>2</sub></b> .                                                                               | 10       |
| Table S4   | Determinations of Cd <sup>2+</sup> in real samples (n = 3).                                                                                                             | 11       |

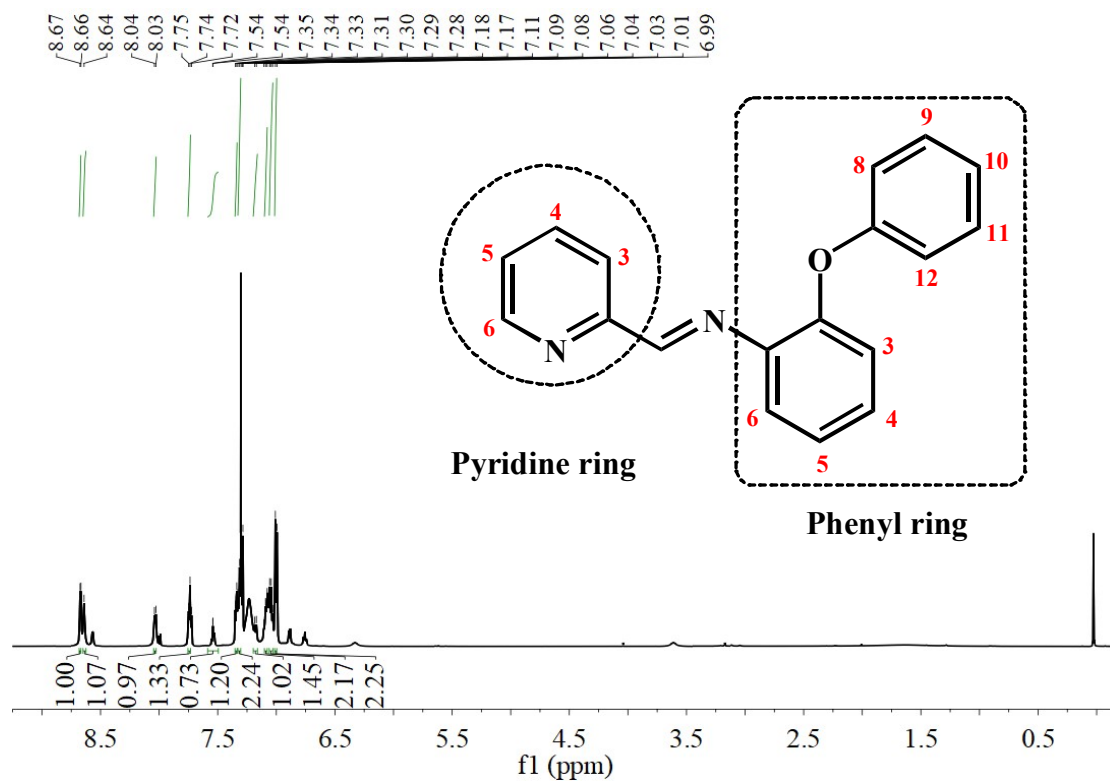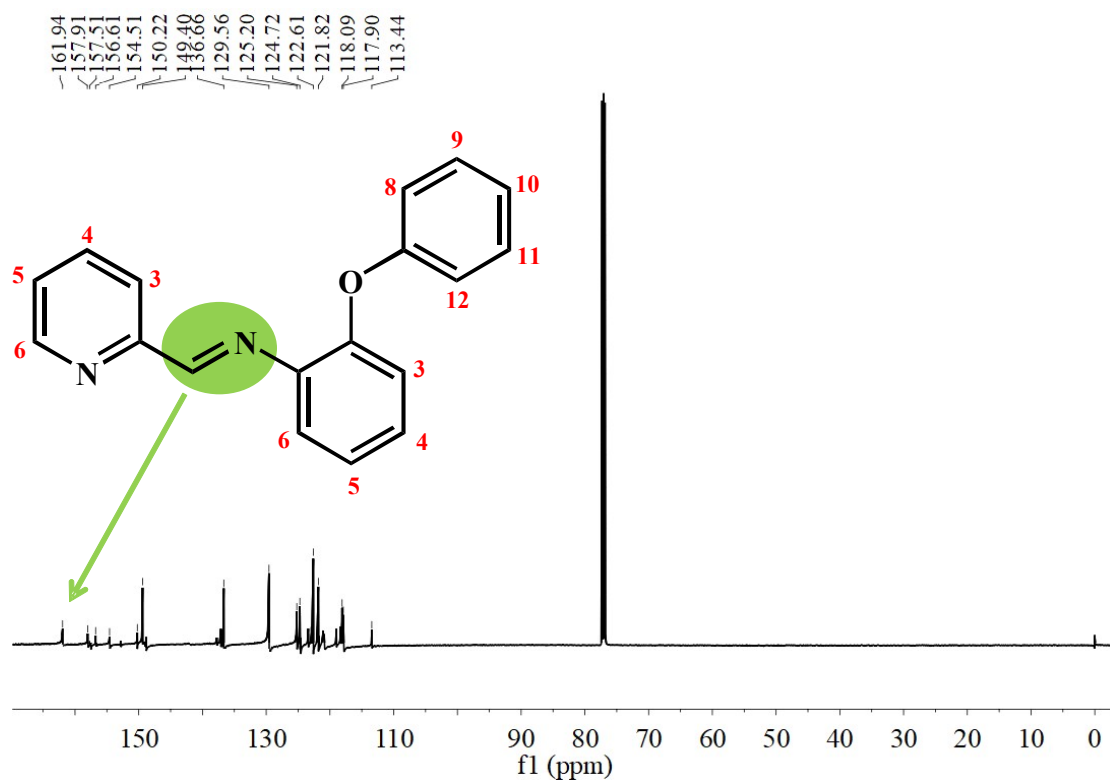

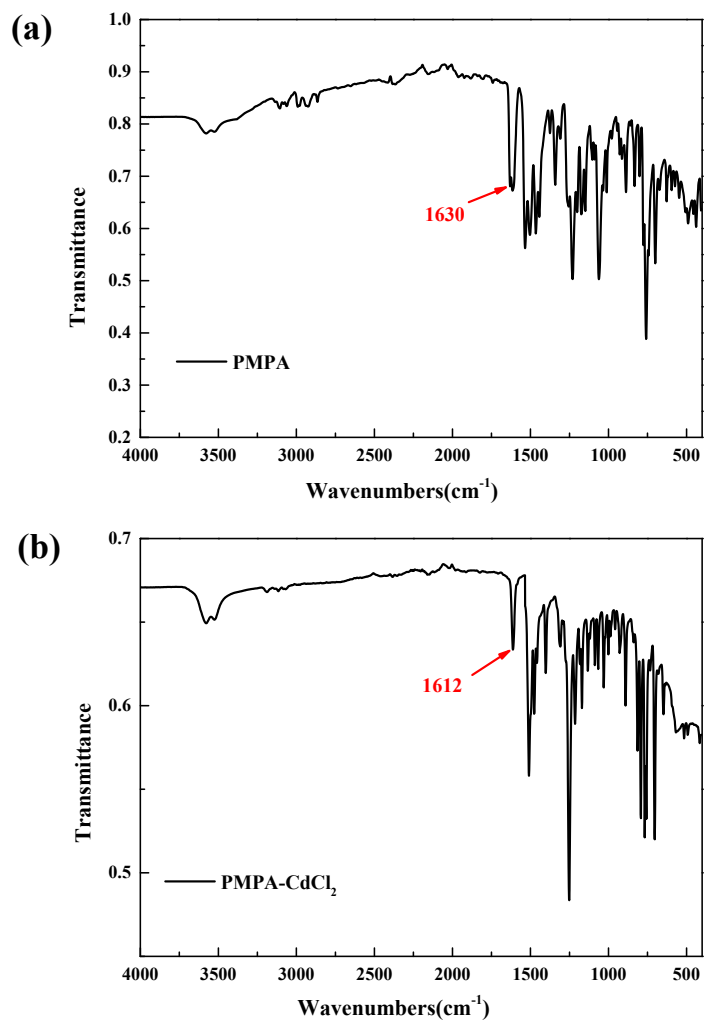

Figure S3. FT-IR spectra of (a) probe PMPA and (b) complex PMPA- $\text{CdCl}_2$ .

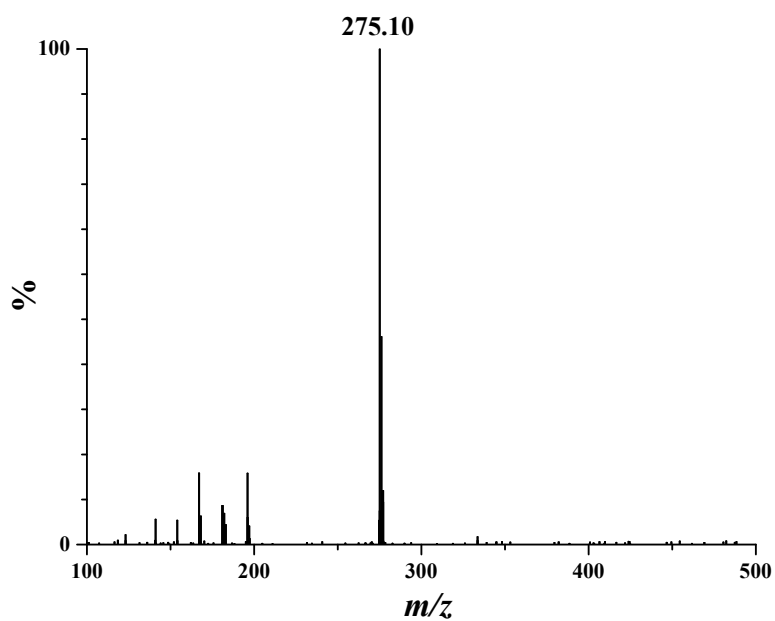

Figure S4. ESI-MS spectrum of probe PMPA.

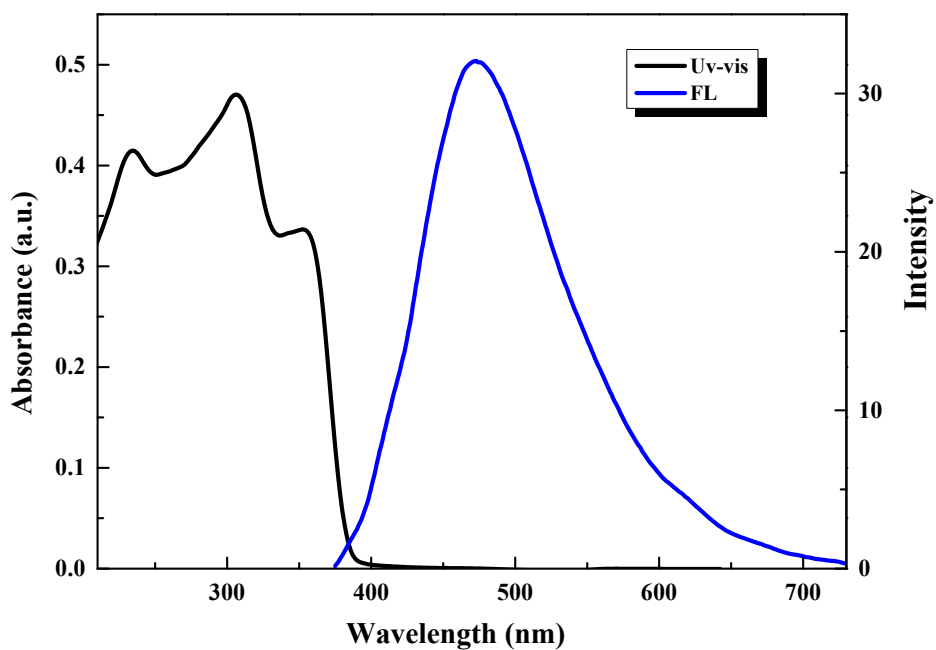

**Figure S5.** Absorption spectra (black line) and fluorescence emission spectra (blue line) of probe **PMPA** in acetonitrile solvent. The concentration was maintained at 10  $\mu$ M.

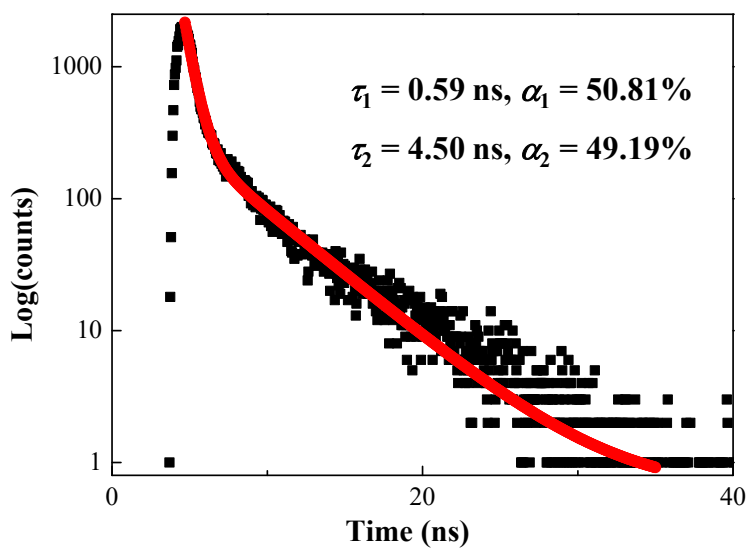

**Figure S6.** Fluorescence decay profile for probe **PMPA** in acetonitrile solution ( $\lambda_{\text{ex}} = 380$  nm,  $\lambda_{\text{em}} = 468$  nm).

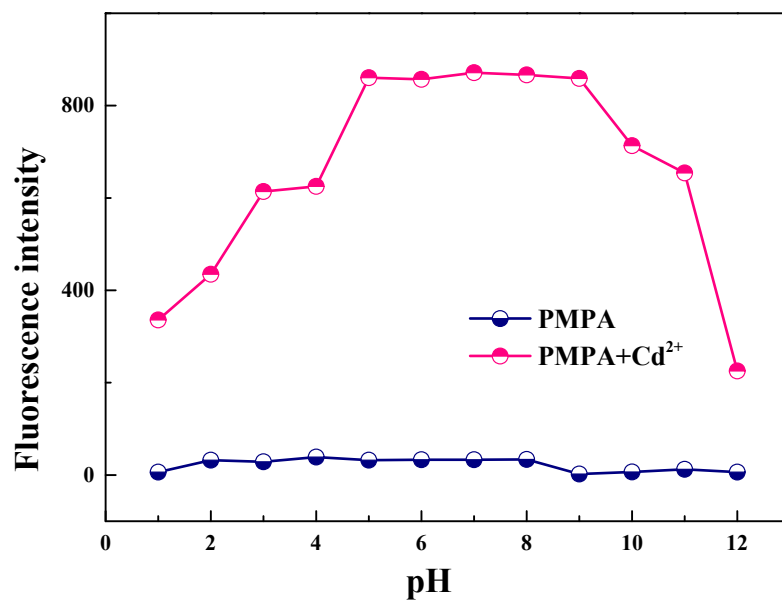

Figure S7. The fluorescence intensity of PMPA and PMPA+Cd<sup>2+</sup> at different pH (1–12).

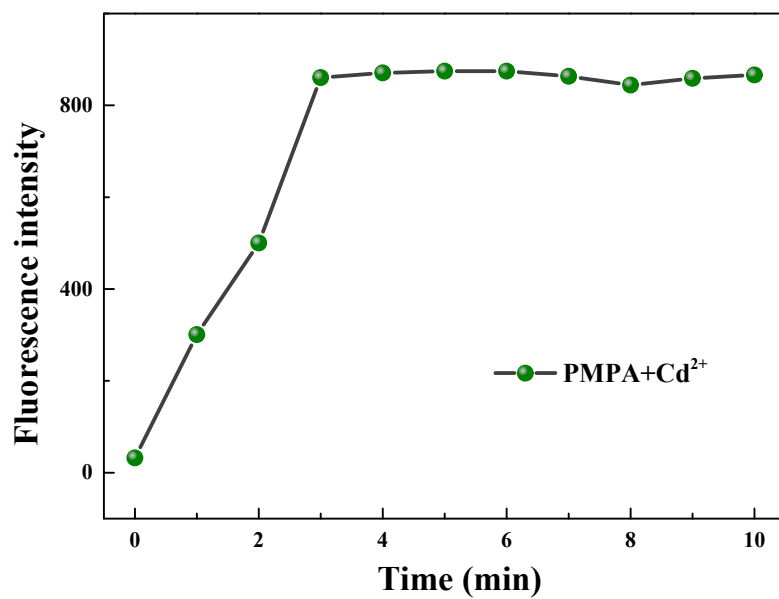

Figure S8. The effect of response time on the fluorescence intensity of PMPA over the addition of Cd<sup>2+</sup> (at 506 nm).

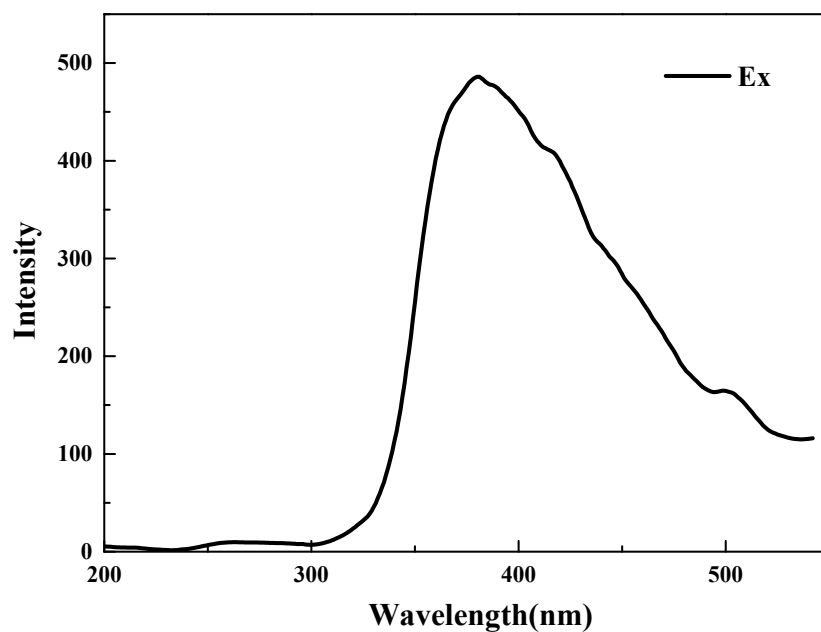

**Figure S9.** The excitation spectrum of probe **PMPA** upon addition of  $\text{Cd}^{2+}$ .

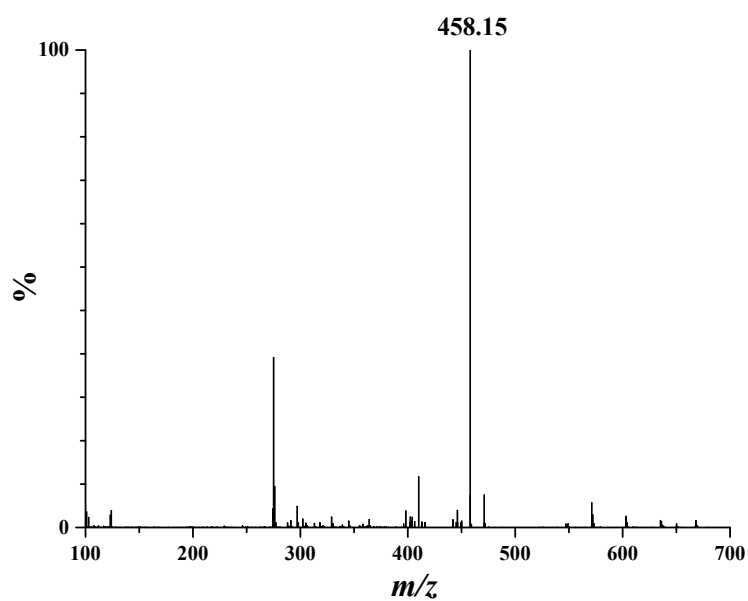

**Figure S10.** ESI-MS spectrum of the complex **PMPA-CdCl<sub>2</sub>**.

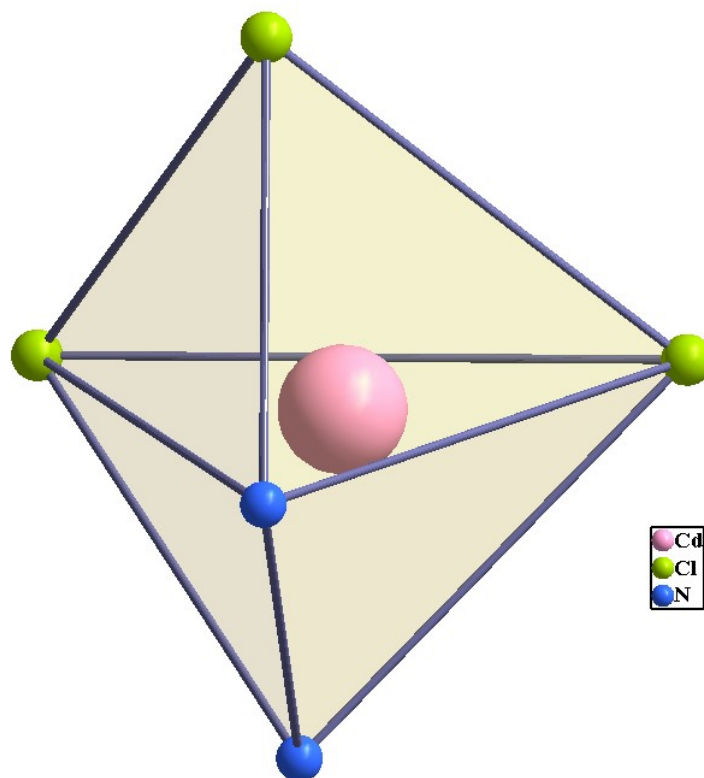

**Figure S11.** Coordination geometry of cadmium(II) ions in the complex **PMPA-CdCl<sub>2</sub>**.

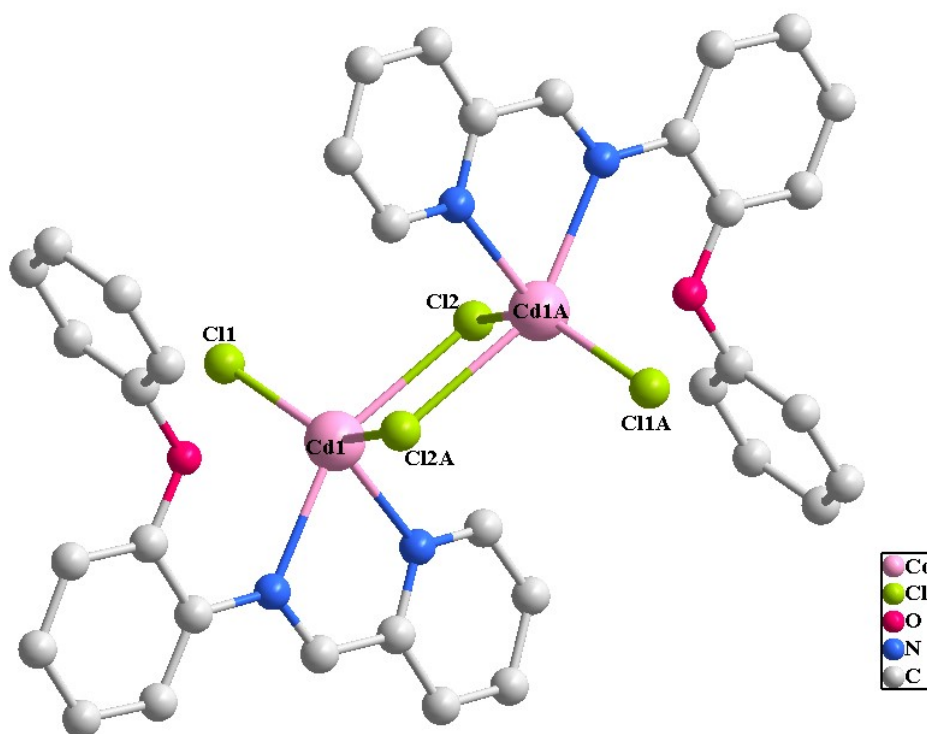

**Figure S12.** The binuclear unit of the complex **PMPA-CdCl<sub>2</sub>**.

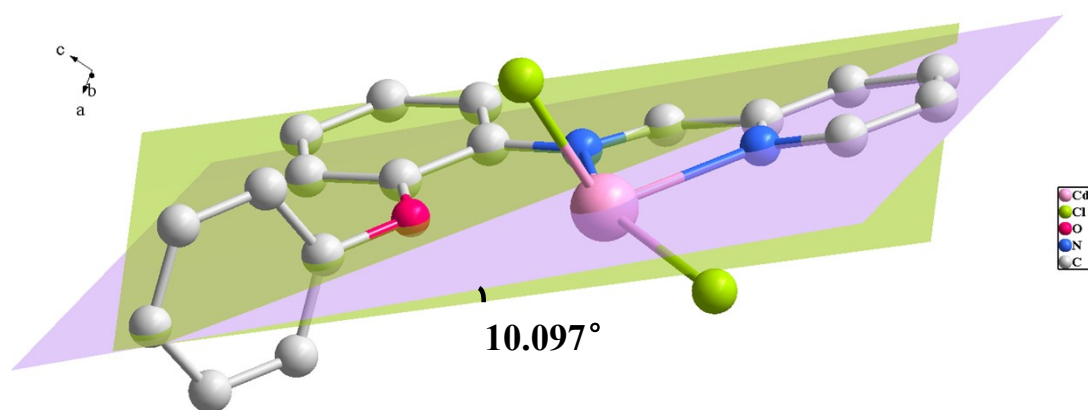

**Figure S13.** Depiction of the dihedral angle between the pyridine ring and the phenyl ring in the complex **PMPA-CdCl<sub>2</sub>**.

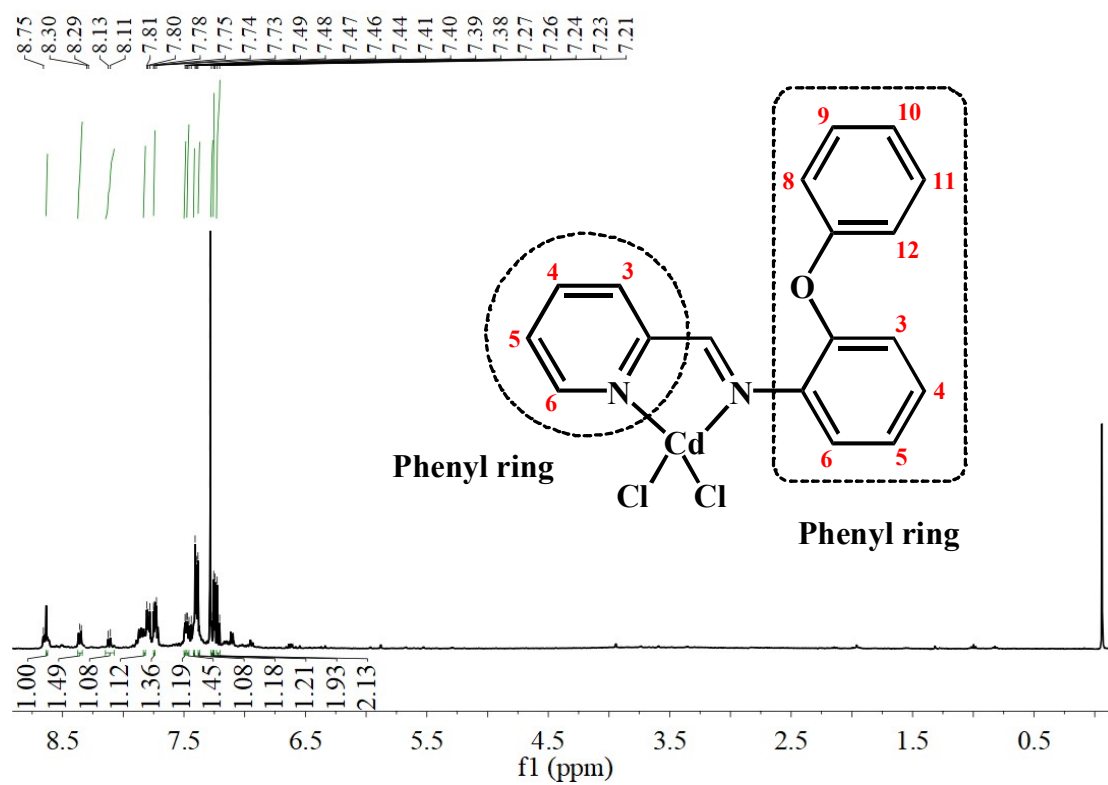

**Figure S14.** <sup>1</sup>H NMR spectrum of the complex **PMPA-CdCl<sub>2</sub>** in CDCl<sub>3</sub>.



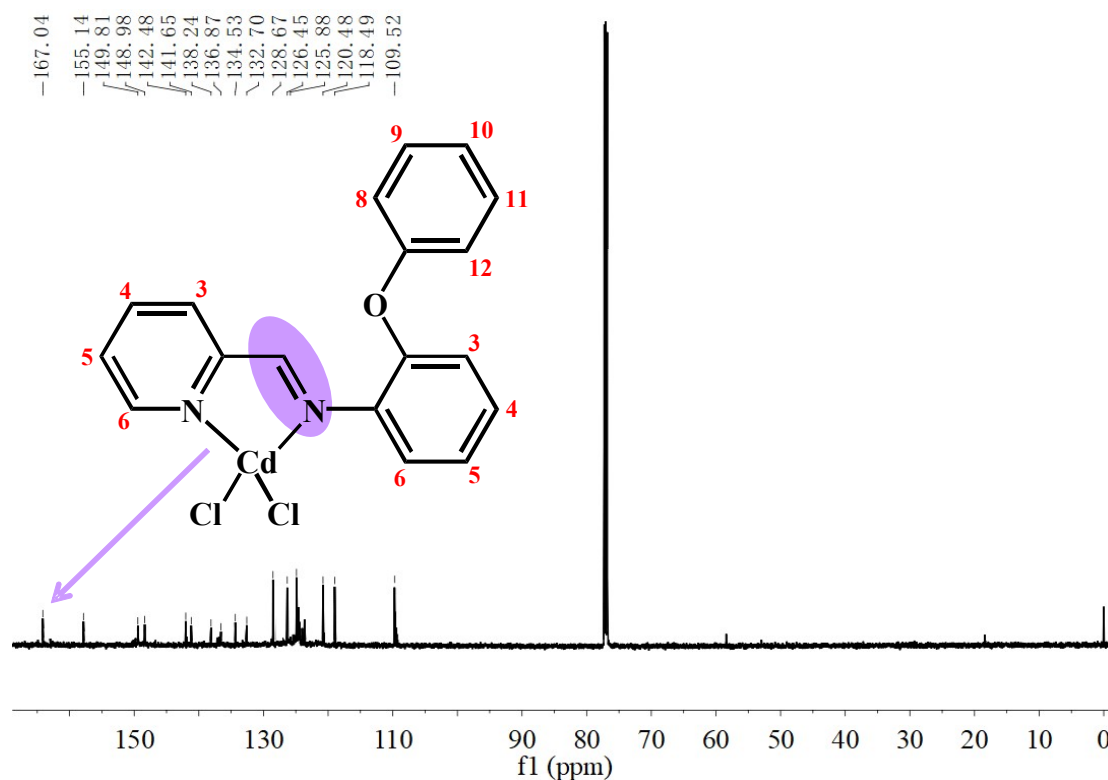

Figure S15.  $^{13}\text{C}$  NMR spectrum of the complex  $\text{PMPA-CdCl}_2$  in  $\text{CDCl}_3$ .

### Standard deviation and detection limit calculation

The detection limit was calculated based on the fluorescence titration. To determine the S/N ratio, fluorescence intensity of **PMPA** without  $\text{Cd}^{2+}$  was measured by five times and the standard deviation of blank measurements was determined. To gain the slop, the fluorescence intensity data at 479 nm for  $\text{Cd}^{2+}$ , were plotted as a concentration of  $\text{Cd}^{2+}$ . So the detection limit was calculated with the follow equation (1):

$$\text{Detection limit} = 3\sigma/m \quad (1)$$

Where  $\sigma$  is the standard deviation of blank measurements, and  $m$  is the slop of fluorescence versus  $\text{Cd}^{2+}$  concentration.

Table S1. Standard deviation calculation.

|                                 | Fluorescence intensity |
|---------------------------------|------------------------|
| Test 1                          | 32.24                  |
| Test 2                          | 28.67                  |
| Test 3                          | 38.95                  |
| Test 4                          | 32.27                  |
| Test 5                          | 33.03                  |
| Standard Deviation ( $\sigma$ ) | 3.72                   |

**Table S2.** Crystallographic and structural determination data for the complex **PMPA–CdCl<sub>2</sub>**.

|                                                                                       | <b>PMPA–CdCl<sub>2</sub></b>                                       |
|---------------------------------------------------------------------------------------|--------------------------------------------------------------------|
| CCDC No.                                                                              | 2122596                                                            |
| formula                                                                               | C <sub>18</sub> H <sub>14</sub> Cl <sub>2</sub> N <sub>2</sub> OCd |
| <i>Mr</i>                                                                             | 457.61                                                             |
| A cryst syst                                                                          | Triclinic                                                          |
| space group                                                                           | <i>P</i> –1                                                        |
| <i>a</i> [Å]                                                                          | 8.0895(2)                                                          |
| <i>b</i> [Å]                                                                          | 8.7415(2)                                                          |
| <i>c</i> [Å]                                                                          | 13.3578(3)                                                         |
| $\alpha$ [°]                                                                          | 108.358(2)                                                         |
| $\beta$ [°]                                                                           | 96.423(2)                                                          |
| $\gamma$ [°]                                                                          | 97.449(2)                                                          |
| Volume [Å <sup>3</sup> ]                                                              | 877.17(4)                                                          |
| <i>Z</i>                                                                              | 2                                                                  |
| <i>D<sub>c</sub></i> [g·cm <sup>–3</sup> ]                                            | 1.733                                                              |
| $\mu$ [mm <sup>–1</sup> ]                                                             | 12.827                                                             |
| <i>F</i> (000)                                                                        | 452                                                                |
| $\Theta$ range [°]                                                                    | 3.533 – 68.293                                                     |
| <i>h</i> range                                                                        | –9 ≤ <i>h</i> ≤ 6                                                  |
| <i>k</i> range                                                                        | –10 ≤ <i>k</i> ≤ 10                                                |
| <i>l</i> range                                                                        | –15 ≤ <i>l</i> ≤ 15                                                |
| data/restraints/params                                                                | 3102 / 0 / 217                                                     |
| GOF                                                                                   | 1.040                                                              |
| <i>R<sub>1</sub></i> , <i>wR<sub>2</sub></i> [ <i>I</i> >2σ( <i>I</i> )] <sup>a</sup> | 0.0474, 0.1220                                                     |
| <i>R<sub>1</sub></i> , <i>wR<sub>2</sub></i> [all data] <sup>a</sup>                  | 0.0487, 0.1234                                                     |
| $\Delta\rho_{\max}$ , $\Delta\rho_{\min}$ [e·Å <sup>–3</sup> ]                        | 0.977, –1.985                                                      |

$$^a R_1 = \frac{\sum ||F_o| - |F_c||}{\sum |F_o|}; wR_2 = \frac{[\sum [w (F_o^2 - F_c^2)^2] / \sum [w (F_o^2)^2]]^{1/2}}{}$$

**Table S3.** Selected bond distances (Å) and angles (°) for the complex **PMPA–CdCl<sub>2</sub>**.

| Parameter          | <b>PMPA–CdCl<sub>2</sub></b> |
|--------------------|------------------------------|
| Cd(1)–N(1)         | 2.338(4)                     |
| Cd(1)–N(2)         | 2.423(3)                     |
| Cd(1)–Cl(1)        | 2.4090(13)                   |
| Cd(1)–Cl(2)        | 2.7424(10)                   |
| Cd(1)–Cl(2A)       | 2.5140(11)                   |
| N(2)–C(6)          | 1.265(6)                     |
| N(2)–Cd(1)–N(1)    | 70.93(12)                    |
| N(1)–Cd(1)–Cl(1)   | 110.93(10)                   |
| N(2)–Cd(1)–Cl(1)   | 105.29(9)                    |
| N(1)–Cd(1)–Cl(2)   | 86.40(9)                     |
| N(2)–Cd(1)–Cl(2)   | 153.76(9)                    |
| Cl(2)–Cd(1)–Cl(1)  | 94.87(4)                     |
| N(1)–Cd(1)–Cl(2A)  | 109.59(10)                   |
| N(2)–Cd(1)–Cl(2A)  | 93.19(9)                     |
| Cl(2)–Cd(1)–Cl(2A) | 81.86(3)                     |
| Cl(2A)–Cd(1)–Cl(1) | 139.04(4)                    |
| C(1)–N(1)–Cd(1)    | 115.7(3)                     |
| C(5)–N(1)–Cd(1)    | 126.2(3)                     |
| C(6)–N(2)–Cd(1)    | 112.8(3)                     |
| C(12)–N(2)–Cd(1)   | 127.1(3)                     |

**Table S4.** Determinations of Cd<sup>2+</sup> in real samples (n = 3).

| Sample          | Added ( $\mu\text{M}$ ) | Measure ( $\mu\text{M}$ ) | Recovery (%) | RSD (%) |
|-----------------|-------------------------|---------------------------|--------------|---------|
| Tap water       | 0                       | 0                         | —            | —       |
|                 | 3                       | 2.56                      | 85.33        | 0.945   |
| Pond water      | 0                       | 0                         | —            | —       |
|                 | 3                       | 1.85                      | 61.67        | 1.470   |
| Hun River water | 0                       | 0                         | —            | —       |
|                 | 3                       | 1.57                      | 52.67        | 1.236   |
